# Supplementary material
Source: PubMed Central journal article supplement (PMC6080118)
Supplement: Supp_Table1.pdf [file Supp_Table1.pdf]

## Supplementary Data

SUPPLEMENTARY TABLE S1. SURFACE PROTEIN MARKERS AS DETERMINED  
BY FLOW CYTOMETRY HISTOGRAM ANALYSIS

---

*Histogram analysis*

---

| <i>Antibody</i> | <i>Net percent positive<br/>CB Donor No. 1</i> | <i>Net percent positive<br/>CB Donor No. 2</i> | <i>Net percent positive<br/>BM Donor No. 1</i> | <i>Net percent positive<br/>BM Donor No. 2</i> |
|-----------------|------------------------------------------------|------------------------------------------------|------------------------------------------------|------------------------------------------------|
| CD29            | 75.67                                          | 71.86                                          | 89.34                                          | 84.81                                          |
| CD44            | 91.57                                          | 97.27                                          | 97.54                                          | 96.81                                          |
| CD90            | 97.95                                          | 97.79                                          | 97.43                                          | 78.11                                          |
| F6b             | 0.57                                           | 0.18                                           | 0.02                                           | 0.00                                           |
| MHCII           | 0.02                                           | 0.24                                           | 0.00                                           | 0.00                                           |
| MHCI            | 26.77                                          | 37.51                                          | 75.52                                          | 83.13                                          |

---

BM, bone marrow; CB, cord blood.
