# Supplementary material
Source: PubMed Central journal article supplement (PMC6080118)
Supplement: Supp_Table2.pdf [file Supp_Table2.pdf]

SUPPLEMENTARY TABLE S2. SURFACE PROTEIN MARKERS AS DETERMINED  
BY FLOW CYTOMETRY SIDE SCATTER ANALYSIS

| <i>Side scatter analysis</i> |                                                |                                                |                                                |                                                |
|------------------------------|------------------------------------------------|------------------------------------------------|------------------------------------------------|------------------------------------------------|
| <i>Antibody</i>              | <i>Net percent positive<br/>CB Donor No. 1</i> | <i>Net percent positive<br/>CB Donor No. 2</i> | <i>Net percent positive<br/>BM Donor No. 1</i> | <i>Net percent positive<br/>BM Donor No. 2</i> |
| CD29                         | 75.07                                          | 72.22                                          | 89.36                                          | 84.48                                          |
| CD44                         | 94.10                                          | 97.81                                          | 98.14                                          | 96.97                                          |
| CD90                         | 98.14                                          | 98.76                                          | 98.14                                          | 85.36                                          |
| F6b                          | 1.32                                           | 0.00                                           | 0.33                                           | 0.00                                           |
| MHCII                        | 0.00                                           | 0.00                                           | 0.00                                           | 0.00                                           |
| MHCI                         | 53.11                                          | 53.41                                          | 88.71                                          | 89.15                                          |
